# Supplementary material for: Understanding online suicidal ideation in China: nationwide distribution, social determinants, and geographic variations
Source: Springer Nature journal article supplement (doi:10.1057/s41599-024-04299-1), 2024-12-23
Supplement: MOESM1 [file 41599_2024_4299_MOESM1_ESM.docx]

**Understanding online suicidal ideation in China: Nationwide distribution, social determinants and geographic variations**

Yanji Zhang, Liang Cai, Chunwu Zhu

**Supplementary Information:**

Table S1 The dataset of suicidal ideation index for each Chinese city

| City | City (Chinese) | Province | Province (Chinese) | Suicidal ideation index | |
| --- | --- | --- | --- | --- | --- |
| Beijing | 北京市 | Beijing | 北京市 | -0.74147 | |
| Tianjin | 天津市 | Tianjin | 天津市 | 0.61328 | |
| Shijiazhuang | 石家庄市 | Hebei | 河北省 | 0.25725 | |
| Tangshan | 唐山市 | Hebei | 河北省 | 0.80892 | |
| Qinhuangdao | 秦皇岛市 | Hebei | 河北省 | 1.08971 | |
| Handan | 邯郸市 | Hebei | 河北省 | 0.62991 | |
| Xingtai | 邢台市 | Hebei | 河北省 | 0.76012 | |
| Baoding | 保定市 | Hebei | 河北省 | 0.45203 | |
| Zhangjiakou | 张家口市 | Hebei | 河北省 | 1.03291 | |
| Chengde | 承德市 | Hebei | 河北省 | 0.45911 | |
| Cangzhou | 沧州市 | Hebei | 河北省 | 1.14499 | |
| Langfang | 廊坊市 | Hebei | 河北省 | 0.74894 | |
| Hengshui | 衡水市 | Hebei | 河北省 | 0.66988 | |
| Taiyuan | 太原市 | Shanxi | 山西省 | 0.26325 | |
| Datong | 大同市 | Shanxi | 山西省 | 0.48870 | |
| Yangquan | 阳泉市 | Shanxi | 山西省 | 0.27072 | |
| Changzhi | 长治市 | Shanxi | 山西省 | 0.24391 | |
| Jincheng | 晋城市 | Shanxi | 山西省 | 0.06961 | |
| Shuozhou | 朔州市 | Shanxi | 山西省 | -0.79614 | |
| Jinzhong | 晋中市 | Shanxi | 山西省 | 0.82081 | |
| Yuncheng | 运城市 | Shanxi | 山西省 | 0.53435 | |
| Xinzhou | 忻州市 | Shanxi | 山西省 | -0.10996 | |
| Linfen | 临汾市 | Shanxi | 山西省 | 0.61480 | |
| Lvliang | 吕梁市 | Shanxi | 山西省 | -0.02040 | |
| Hohhot | 呼和浩特市 | Inner Mongolia | 内蒙古自治区 | 0.62806 | |
| Baotou | 包头市 | Inner Mongolia | 内蒙古自治区 | 0.88162 | |
| Wuhai | 乌海市 | Inner Mongolia | 内蒙古自治区 | -0.62866 | |
| Chifeng | 赤峰市 | Inner Mongolia | 内蒙古自治区 | 0.59762 | |
| Tongliao | 通辽市 | Inner Mongolia | 内蒙古自治区 | 0.26237 | |
| Ordos | 鄂尔多斯市 | Inner Mongolia | 内蒙古自治区 | -0.03172 | |
| Hulun Buir | 呼伦贝尔市 | Inner Mongolia | 内蒙古自治区 | 0.39134 | |
| Bayan Nur | 巴彦淖尔市 | Inner Mongolia | 内蒙古自治区 | -0.68474 | |
| Ulanqab | 乌兰察布市 | Inner Mongolia | 内蒙古自治区 | -0.55487 | |
| Hing'an League | 兴安盟 | Inner Mongolia | 内蒙古自治区 | -0.80853 | |
| Xilingol League | 锡林郭勒盟 | Inner Mongolia | 内蒙古自治区 | -0.90916 | |
| Alxa League | 阿拉善盟 | Inner Mongolia | 内蒙古自治区 | -1.14193 | |
| Shenyang | 沈阳市 | Liaoning | 辽宁省 | 0.39111 | |
| Dalian | 大连市 | Liaoning | 辽宁省 | 0.88436 | |
| Anshan | 鞍山市 | Liaoning | 辽宁省 | 1.06468 | |
| Fushun | 抚顺市 | Liaoning | 辽宁省 | 0.88233 | |
| Benxi | 本溪市 | Liaoning | 辽宁省 | 0.49169 | |
| Dandong | 丹东市 | Liaoning | 辽宁省 | 0.69651 | |
| Jinzhou | 锦州市 | Liaoning | 辽宁省 | 1.06288 | |
| Yingkou | 营口市 | Liaoning | 辽宁省 | 0.45793 | |
| Fuxin | 阜新市 | Liaoning | 辽宁省 | 0.13167 | |
| Liaoyang | 辽阳市 | Liaoning | 辽宁省 | 0.29950 | |
| Panjin | 盘锦市 | Liaoning | 辽宁省 | 0.00181 | |
| Tieling | 铁岭市 | Liaoning | 辽宁省 | 0.19092 | |
| Chaoyang | 朝阳市 | Liaoning | 辽宁省 | 0.00707 | |
| Huludao | 葫芦岛市 | Liaoning | 辽宁省 | 0.63916 | |
| Changchun | 长春市 | Jilin | 吉林省 | 0.60525 | |
| Jilin | 吉林市 | Jilin | 吉林省 | 1.34065 | |
| Siping | 四平市 | Jilin | 吉林省 | 0.25385 | |
| Liaoyuan | 辽源市 | Jilin | 吉林省 | -0.57809 | |
| Tonghua | 通化市 | Jilin | 吉林省 | 0.19382 | |
| Baishan | 白山市 | Jilin | 吉林省 | -0.23428 | |
| Songyuan | 松原市 | Jilin | 吉林省 | -0.12339 | |
| Baicheng | 白城市 | Jilin | 吉林省 | -0.33311 | |
| Yanbian | 延边朝鲜族自治州 | Jilin | 吉林省 | 0.74338 | |
| Harbin | 哈尔滨市 | Heilongjiang | 黑龙江省 | 0.40612 | |
| Qiqihar | 齐齐哈尔市 | Heilongjiang | 黑龙江省 | 1.04515 | |
| Jixi | 鸡西市 | Heilongjiang | 黑龙江省 | -0.14277 | |
| Hegang | 鹤岗市 | Heilongjiang | 黑龙江省 | -0.14469 | |
| Shuangyashan | 双鸭山市 | Heilongjiang | 黑龙江省 | -0.50432 | |
| Daqing | 大庆市 | Heilongjiang | 黑龙江省 | 1.28448 | |
| Yichun | 伊春市 | Heilongjiang | 黑龙江省 | -0.04145 | |
| Jiamusi | 佳木斯市 | Heilongjiang | 黑龙江省 | 0.29185 | |
| Qitaihe | 七台河市 | Heilongjiang | 黑龙江省 | -0.59901 | |
| Mudanjiang | 牡丹江市 | Heilongjiang | 黑龙江省 | 0.99790 | |
| Heihe | 黑河市 | Heilongjiang | 黑龙江省 | 0.17668 | |
| Suihua | 绥化市 | Heilongjiang | 黑龙江省 | 0.53383 | |
| Daxing'anling | 大兴安岭地区 | Heilongjiang | 黑龙江省 | -0.84599 | |
| Shanghai | 上海市 | Shanghai | 上海市 | -0.34241 | |
| Nanjing | 南京市 | Jiangsu | 江苏省 | 0.49253 | |
| Wuxi | 无锡市 | Jiangsu | 江苏省 | 1.09277 | |
| Xuzhou | 徐州市 | Jiangsu | 江苏省 | 1.16649 | |
| Changzhou | 常州市 | Jiangsu | 江苏省 | 1.37503 | |
| Suzhou | 苏州市 | Jiangsu | 江苏省 | 0.21700 | |
| Nantong | 南通市 | Jiangsu | 江苏省 | 1.06450 | |
| Lianyungang | 连云港市 | Jiangsu | 江苏省 | 0.78633 | |
| Huai'an | 淮安市 | Jiangsu | 江苏省 | 0.61558 | |
| Yancheng | 盐城市 | Jiangsu | 江苏省 | 1.13486 | |
| Yangzhou | 扬州市 | Jiangsu | 江苏省 | 1.35246 | |
| Zhenjiang | 镇江市 | Jiangsu | 江苏省 | 1.49158 | |
| Taizhou | 泰州市 | Jiangsu | 江苏省 | 1.00172 | |
| Suqian | 宿迁市 | Jiangsu | 江苏省 | 0.63938 | |
| Hangzhou | 杭州市 | Zhejiang | 浙江省 | -0.26727 | |
| Ningbo | 宁波市 | Zhejiang | 浙江省 | 0.96397 | |
| Wenzhou | 温州市 | Zhejiang | 浙江省 | 1.14752 | |
| Jiaxing | 嘉兴市 | Zhejiang | 浙江省 | 1.70299 | |
| Huzhou | 湖州市 | Zhejiang | 浙江省 | 1.41189 | |
| Shaoxing | 绍兴市 | Zhejiang | 浙江省 | 1.58995 | |
| Jinhua | 金华市 | Zhejiang | 浙江省 | 1.00570 | |
| Quzhou | 衢州市 | Zhejiang | 浙江省 | 0.17346 | |
| Zhoushan | 舟山市 | Zhejiang | 浙江省 | 0.66562 | |
| Taizhou | 台州市 | Zhejiang | 浙江省 | 1.51431 | |
| Lishui | 丽水市 | Zhejiang | 浙江省 | 0.58393 | |
| Hefei | 合肥市 | Anhui | 安徽省 | 0.10528 | |
| Wuhu | 芜湖市 | Anhui | 安徽省 | 0.74703 | |
| Bengbu | 蚌埠市 | Anhui | 安徽省 | 0.31808 | |
| Huainan | 淮南市 | Anhui | 安徽省 | 0.10674 | |
| Ma'anshan | 马鞍山市 | Anhui | 安徽省 | 0.50275 | |
| Huaibei | 淮北市 | Anhui | 安徽省 | -0.33344 | |
| Tongling | 铜陵市 | Anhui | 安徽省 | -0.08247 | |
| Anqing | 安庆市 | Anhui | 安徽省 | 0.26043 | |
| Huangshan | 黄山市 | Anhui | 安徽省 | -0.14986 | |
| Chuzhou | 滁州市 | Anhui | 安徽省 | 0.49967 | |
| Fuyang | 阜阳市 | Anhui | 安徽省 | 0.39074 | |
| Suzhou | 宿州市 | Anhui | 安徽省 | -0.00212 | |
| Lu'an | 六安市 | Anhui | 安徽省 | 0.31265 | |
| Bozhou | 亳州市 | Anhui | 安徽省 | -0.40796 | |
| Chizhou | 池州市 | Anhui | 安徽省 | -0.64355 | |
| Xuancheng | 宣城市 | Anhui | 安徽省 | 0.32228 | |
| Fuzhou | 福州市 | Fujian | 福建省 | 0.75932 | |
| Xiamen | 厦门市 | Fujian | 福建省 | 0.98477 | |
| Putian | 莆田市 | Fujian | 福建省 | 0.81162 | |
| Sanming | 三明市 | Fujian | 福建省 | 0.48473 | |
| Quanzhou | 泉州市 | Fujian | 福建省 | 0.79610 | |
| Zhangzhou | 漳州市 | Fujian | 福建省 | 0.46203 | |
| Nanping | 南平市 | Fujian | 福建省 | 0.48794 | |
| Longyan | 龙岩市 | Fujian | 福建省 | -0.00658 | |
| Ningde | 宁德市 | Fujian | 福建省 | 0.58536 | |
| Nanchang | 南昌市 | Jiangxi | 江西省 | 0.58058 | |
| Jingdezhen | 景德镇市 | Jiangxi | 江西省 | -0.26527 | |
| Pingxiang | 萍乡市 | Jiangxi | 江西省 | -0.42235 | |
| Jiujiang | 九江市 | Jiangxi | 江西省 | 0.65484 | |
| Xinyu | 新余市 | Jiangxi | 江西省 | -0.49045 | |
| Yingtan | 鹰潭市 | Jiangxi | 江西省 | -0.58190 | |
| Ganzhou | 赣州市 | Jiangxi | 江西省 | 1.02763 | |
| Ji'an | 吉安市 | Jiangxi | 江西省 | 0.07790 | |
| Yichun | 宜春市 | Jiangxi | 江西省 | 0.51763 | |
| Fuzhou | 抚州市 | Jiangxi | 江西省 | -0.19660 | |
| Shangrao | 上饶市 | Jiangxi | 江西省 | 0.42780 | |
| Jinan | 济南市 | Shandong | 山东省 | 0.64774 | |
| Qingdao | 青岛市 | Shandong | 山东省 | 0.83820 | |
| Zibo | 淄博市 | Shandong | 山东省 | 1.90396 | |
| Zaozhuang | 枣庄市 | Shandong | 山东省 | -0.27815 | |
| Dongying | 东营市 | Shandong | 山东省 | 1.57276 | |
| Yantai | 烟台市 | Shandong | 山东省 | 1.48147 | |
| Weifang | 潍坊市 | Shandong | 山东省 | 1.26289 | |
| Jining | 济宁市 | Shandong | 山东省 | 1.71906 | |
| Tai'an | 泰安市 | Shandong | 山东省 | 2.22367 | |
| Weihai | 威海市 | Shandong | 山东省 | 1.07312 | |
| Rizhao | 日照市 | Shandong | 山东省 | 0.64479 | |
| Linyi | 临沂市 | Shandong | 山东省 | 1.06048 | |
| Dezhou | 德州市 | Shandong | 山东省 | 1.15558 | |
| Liaocheng | 聊城市 | Shandong | 山东省 | 0.96738 | |
| Binzhou | 滨州市 | Shandong | 山东省 | 1.43255 | |
| Heze | 菏泽市 | Shandong | 山东省 | 0.65702 | |
| Zhengzhou | 郑州市 | Henan | 河南省 | -0.18935 | |
| Kaifeng | 开封市 | Henan | 河南省 | 0.34413 | |
| Luoyang | 洛阳市 | Henan | 河南省 | 0.74222 | |
| Pingdingshan | 平顶山市 | Henan | 河南省 | 0.52312 | |
| Anyang | 安阳市 | Henan | 河南省 | 0.69559 | |
| Hebi | 鹤壁市 | Henan | 河南省 | -0.50436 | |
| Xinxiang | 新乡市 | Henan | 河南省 | 0.79156 | |
| Jiaozuo | 焦作市 | Henan | 河南省 | 0.48245 | |
| Puyang | 濮阳市 | Henan | 河南省 | 0.16080 | |
| Xuchang | 许昌市 | Henan | 河南省 | 0.34314 | |
| Luohe | 漯河市 | Henan | 河南省 | -0.20524 | |
| Sanmenxia | 三门峡市 | Henan | 河南省 | -0.21649 | |
| Nanyang | 南阳市 | Henan | 河南省 | 0.73280 | |
| Shangqiu | 商丘市 | Henan | 河南省 | 0.67596 | |
| Xinyang | 信阳市 | Henan | 河南省 | 0.98981 | |
| Zhoukou | 周口市 | Henan | 河南省 | 0.15052 | |
| Zhumadian | 驻马店市 | Henan | 河南省 | 0.20661 | |
| Jiyuan | 济源市 | Henan | 河南省 | -1.29334 | |
| Wuhan | 武汉市 | Hubei | 湖北省 | 0.11149 | |
| Huangshi | 黄石市 | Hubei | 湖北省 | 0.28842 | |
| Shiyan | 十堰市 | Hubei | 湖北省 | 0.65121 | |
| Yichang | 宜昌市 | Hubei | 湖北省 | 1.26258 | |
| Xiangyang | 襄阳市 | Hubei | 湖北省 | 1.81141 | |
| Ezhou | 鄂州市 | Hubei | 湖北省 | -0.34228 | |
| Jingmen | 荆门市 | Hubei | 湖北省 | 0.18565 | |
| Xiaogan | 孝感市 | Hubei | 湖北省 | 0.72733 | |
| Jingzhou | 荆州市 | Hubei | 湖北省 | 1.04550 | |
| Huanggang | 黄冈市 | Hubei | 湖北省 | 0.79931 | |
| Xianning | 咸宁市 | Hubei | 湖北省 | -0.19687 | |
| Suizhou | 随州市 | Hubei | 湖北省 | -0.55501 | |
| Enshi | 恩施土家族苗族自治州 | Hubei | 湖北省 | -0.06720 | |
| Xiantao | 仙桃市 | Hubei | 湖北省 | -0.67587 | |
| Qianjiang | 潜江市 | Hubei | 湖北省 | -0.54859 | |
| Tianmen | 天门市 | Hubei | 湖北省 | -0.76085 | |
| Shennongjia Forestry District | 神农架林区 | Hubei | 湖北省 | -1.70803 | |
| Changsha | 长沙市 | Hunan | 湖南省 | 0.11479 | |
| Zhuzhou | 株洲市 | Hunan | 湖南省 | 0.51960 | |
| Xiangtan | 湘潭市 | Hunan | 湖南省 | 0.06304 | |
| Hengyang | 衡阳市 | Hunan | 湖南省 | 0.80398 | |
| Shaoyang | 邵阳市 | Hunan | 湖南省 | -0.10186 | |
| Yueyang | 岳阳市 | Hunan | 湖南省 | 0.42379 | |
| Changde | 常德市 | Hunan | 湖南省 | 0.48894 | |
| Zhangjiajie | 张家界市 | Hunan | 湖南省 | -0.78739 | |
| Yiyang | 益阳市 | Hunan | 湖南省 | -0.11526 | |
| Chenzhou | 郴州市 | Hunan | 湖南省 | 0.25743 | |
| Yongzhou | 永州市 | Hunan | 湖南省 | -0.05468 | |
| Huaihua | 怀化市 | Hunan | 湖南省 | 0.13165 | |
| Loudi | 娄底市 | Hunan | 湖南省 | -0.14873 | |
| Xiangxi | 湘西土家族苗族自治州 | Hunan | 湖南省 | -0.38689 | |
| Guangzhou | 广州市 | Guangdong | 广东省 | -0.29963 | |
| Shaoguan | 韶关市 | Guangdong | 广东省 | 0.54028 | |
| Shenzhen | 深圳市 | Guangdong | 广东省 | 0.06487 | |
| Zhuhai | 珠海市 | Guangdong | 广东省 | 1.32726 | |
| Shantou | 汕头市 | Guangdong | 广东省 | 1.89523 | |
| Foshan | 佛山市 | Guangdong | 广东省 | 0.65647 | |
| Jiangmen | 江门市 | Guangdong | 广东省 | 1.11283 | |
| Zhanjiang | 湛江市 | Guangdong | 广东省 | 1.21651 | |
| Maoming | 茂名市 | Guangdong | 广东省 | 0.53364 | |
| Zhaoqing | 肇庆市 | Guangdong | 广东省 | 0.79905 | |
| Huizhou | 惠州市 | Guangdong | 广东省 | 1.04606 | |
| Meizhou | 梅州市 | Guangdong | 广东省 | 0.40357 | |
| Shanwei | 汕尾市 | Guangdong | 广东省 | 0.61195 | |
| Heyuan | 河源市 | Guangdong | 广东省 | -0.10827 | |
| Yangjiang | 阳江市 | Guangdong | 广东省 | 0.06846 | |
| Qingyuan | 清远市 | Guangdong | 广东省 | 0.31705 | |
| Dongguan | 东莞市 | Guangdong | 广东省 | 0.55904 | |
| Zhongshan | 中山市 | Guangdong | 广东省 | 0.96893 | |
| Chaozhou | 潮州市 | Guangdong | 广东省 | 0.52297 | |
| Jieyang | 揭阳市 | Guangdong | 广东省 | 1.56056 | |
| Yunfu | 云浮市 | Guangdong | 广东省 | 0.07080 | |
| Nanning | 南宁市 | Guangxi | 广西壮族自治区 | 0.90659 | |
| Liuzhou | 柳州市 | Guangxi | 广西壮族自治区 | -1.89404 | |
| Guilin | 桂林市 | Guangxi | 广西壮族自治区 | 1.56554 | |
| Wuzhou | 梧州市 | Guangxi | 广西壮族自治区 | 0.46122 | |
| Beihai | 北海市 | Guangxi | 广西壮族自治区 | 0.03983 | |
| Fangchenggang | 防城港市 | Guangxi | 广西壮族自治区 | -0.50191 | |
| Qinzhou | 钦州市 | Guangxi | 广西壮族自治区 | -0.18453 | |
| Guigang | 贵港市 | Guangxi | 广西壮族自治区 | -0.15194 | |
| Yulin | 玉林市 | Guangxi | 广西壮族自治区 | 0.22969 | |
| Baise | 百色市 | Guangxi | 广西壮族自治区 | -0.09415 | |
| Hezhou | 贺州市 | Guangxi | 广西壮族自治区 | -0.60867 | |
| Hechi | 河池市 | Guangxi | 广西壮族自治区 | 0.18172 | |
| Laibin | 来宾市 | Guangxi | 广西壮族自治区 | -0.64214 | |
| Chongzuo | 崇左市 | Guangxi | 广西壮族自治区 | -0.82413 | |
| Haikou | 海口市 | Hainan | 海南省 | 0.50871 | |
| Sanya | 三亚市 | Hainan | 海南省 | -0.44744 | |
| Danzhou | 儋州市 | Hainan | 海南省 | -1.23531 | |
| Wuzhishan | 五指山市 | Hainan | 海南省 | -1.78061 | |
| Qionghai | 琼海市 | Hainan | 海南省 | -1.28095 | |
| Wenchang | 文昌市 | Hainan | 海南省 | -1.48095 | |
| Wanning | 万宁市 | Hainan | 海南省 | -1.44524 | |
| Dongfang | 东方市 | Hainan | 海南省 | -1.49587 | |
| Ding'an | 定安县 | Hainan | 海南省 | -1.79620 | |
| Tunchang | 屯昌县 | Hainan | 海南省 | -1.65776 | |
| Chengmai | 澄迈县 | Hainan | 海南省 | -1.53905 | |
| Lingao | 临高县 | Hainan | 海南省 | -1.70773 | |
| Baisha | 白沙黎族自治县 | Hainan | 海南省 | -1.72648 | |
| Changjiang | 昌江黎族自治县 | Hainan | 海南省 | -1.62686 | |
| Ledong | 乐东黎族自治县 | Hainan | 海南省 | -1.69369 | |
| Lingshui | 陵水黎族自治县 | Hainan | 海南省 | -1.52800 | |
| Baoting | 保亭黎族苗族自治县 | Hainan | 海南省 | -1.65060 | |
| Qiongzhong | 琼中黎族苗族自治县 | Hainan | 海南省 | -1.70598 | |
| Chongqing | 重庆市 | Chongqing | 重庆市 | -0.10998 | |
| Chengdu | 成都市 | Sichuan | 四川省 | -0.52629 | |
| Zigong | 自贡市 | Sichuan | 四川省 | -0.20512 | |
| Panzhihua | 攀枝花市 | Sichuan | 四川省 | -0.40363 | |
| Luzhou | 泸州市 | Sichuan | 四川省 | 0.98231 | |
| Deyang | 德阳市 | Sichuan | 四川省 | 0.27625 | |
| Mianyang | 绵阳市 | Sichuan | 四川省 | 0.44434 | |
| Guangyuan | 广元市 | Sichuan | 四川省 | -0.49085 | |
| Suining | 遂宁市 | Sichuan | 四川省 | -0.65022 | |
| Neijiang | 内江市 | Sichuan | 四川省 | -0.32359 | |
| Leshan | 乐山市 | Sichuan | 四川省 | 0.19041 | |
| Nanchong | 南充市 | Sichuan | 四川省 | 0.47851 | |
| Meishan | 眉山市 | Sichuan | 四川省 | -0.39326 | |
| Yibin | 宜宾市 | Sichuan | 四川省 | 0.27382 | |
| Guang'an | 广安市 | Sichuan | 四川省 | -0.51789 | |
| Dazhou | 达州市 | Sichuan | 四川省 | 0.48288 | |
| Ya'an | 雅安市 | Sichuan | 四川省 | -0.38846 | |
| Bazhong | 巴中市 | Sichuan | 四川省 | -0.73170 | |
| Ziyang | 资阳市 | Sichuan | 四川省 | -0.46966 | |
| Aba | 阿坝藏族羌族自治州 | Sichuan | 四川省 | -1.19173 | |
| Ganzi | 甘孜藏族自治州 | Sichuan | 四川省 | -1.29554 | |
| Liangshan | 凉山彝族自治州 | Sichuan | 四川省 | -0.47286 | |
| Guiyang | 贵阳市 | Guizhou | 贵州省 | 0.35145 | |
| Liupanshui | 六盘水市 | Guizhou | 贵州省 | -0.64186 | |
| Zunyi | 遵义市 | Guizhou | 贵州省 | 0.26804 | |
| Anshun | 安顺市 | Guizhou | 贵州省 | -0.50573 | |
| Bijie | 毕节市 | Guizhou | 贵州省 | -0.11811 | |
| Tongren | 铜仁市 | Guizhou | 贵州省 | -0.58970 | |
| Qianxinan | 黔西南布依族苗族自治州 | Guizhou | 贵州省 | -0.92014 | |
| Qiandongnan | 黔东南苗族侗族自治州 | Guizhou | 贵州省 | -0.20203 | |
| Qiannan | 黔南布依族苗族自治州 | Guizhou | 贵州省 | -0.10900 | |
| Kunming | 昆明市 | Yunnan | 云南省 | 0.13535 | |
| Qujing | 曲靖市 | Yunnan | 云南省 | 0.23487 | |
| Yuxi | 玉溪市 | Yunnan | 云南省 | -0.33775 | |
| Baoshan | 保山市 | Yunnan | 云南省 | -0.85879 | |
| Zhaotong | 昭通市 | Yunnan | 云南省 | -0.66558 | |
| Lijiang | 丽江市 | Yunnan | 云南省 | -1.08006 | |
| Pu'er | 普洱市 | Yunnan | 云南省 | -1.16202 | |
| Lincang | 临沧市 | Yunnan | 云南省 | -0.81265 | |
| Chuxiong | 楚雄彝族自治州 | Yunnan | 云南省 | -0.76398 | |
| Honghe | 红河哈尼族彝族自治州 | Yunnan | 云南省 | 0.12877 | |
| Wenshan | 文山壮族苗族自治州 | Yunnan | 云南省 | -0.71742 | |
| Xishuangbanna | 西双版纳傣族自治州 | Yunnan | 云南省 | -1.11153 | |
| Dali | 大理白族自治州 | Yunnan | 云南省 | -0.04330 | |
| Dehong | 德宏傣族景颇族自治州 | Yunnan | 云南省 | -1.16439 | |
| Nujiang | 怒江傈僳族自治州 | Yunnan | 云南省 | -1.62770 | |
| Diqing | 迪庆藏族自治州 | Yunnan | 云南省 | -1.51258 | |
| Lhasa | 拉萨市 | Tibet | 西藏自治区 | -0.93741 | |
| Shigatse | 日喀则市 | Tibet | 西藏自治区 | -1.62030 | |
| Changdo | 昌都市 | Tibet | 西藏自治区 | -1.56084 | |
| Nyingchi | 林芝市 | Tibet | 西藏自治区 | -1.52569 | |
| Shannan | 山南市 | Tibet | 西藏自治区 | -1.71409 | |
| Naqu | 那曲市 | Tibet | 西藏自治区 | -1.73336 | |
| Ali | 阿里地区 | Tibet | 西藏自治区 | -1.76371 | |
| Xi'an | 西安市 | Shaanxi | 陕西省 | 0.01957 | |
| Tongchuan | 铜川市 | Shaanxi | 陕西省 | -0.81103 | |
| Baoji | 宝鸡市 | Shaanxi | 陕西省 | 1.08202 | |
| Xianyang | 咸阳市 | Shaanxi | 陕西省 | 0.96209 | |
| Weinan | 渭南市 | Shaanxi | 陕西省 | 0.78789 | |
| Yan'an | 延安市 | Shaanxi | 陕西省 | -0.49012 | |
| Hanzhong | 汉中市 | Shaanxi | 陕西省 | 1.13224 | |
| Yulin | 榆林市 | Shaanxi | 陕西省 | 0.57753 | |
| Ankang | 安康市 | Shaanxi | 陕西省 | 0.25609 | |
| Shangluo | 商洛市 | Shaanxi | 陕西省 | -0.52238 | |
| Lanzhou | 兰州市 | Gansu | 甘肃省 | 0.95836 | |
| Jiayuguan | 嘉峪关市 | Gansu | 甘肃省 | -0.20977 | |
| Jinchang | 金昌市 | Gansu | 甘肃省 | -1.31724 | |
| Baiyin | 白银市 | Gansu | 甘肃省 | -0.45524 | |
| Tianshui | 天水市 | Gansu | 甘肃省 | -0.41944 | |
| Wuwei | 武威市 | Gansu | 甘肃省 | -0.16055 | |
| Zhangye | 张掖市 | Gansu | 甘肃省 | -0.12840 | |
| Pingliang | 平凉市 | Gansu | 甘肃省 | -0.38162 | |
| Jiuquan | 酒泉市 | Gansu | 甘肃省 | -0.45659 | |
| Qingyang | 庆阳市 | Gansu | 甘肃省 | -0.54746 | |
| Dingxi | 定西市 | Gansu | 甘肃省 | -0.90539 | |
| Longnan | 陇南市 | Gansu | 甘肃省 | -0.93764 | |
| Linxia | 临夏回族自治州 | Gansu | 甘肃省 | -1.15985 | |
| Gannan | 甘南藏族自治州 | Gansu | 甘肃省 | -1.54161 | |
| Xining | 西宁市 | Qinghai | 青海省 | 0.89817 | |
| Haidong | 海东市 | Qinghai | 青海省 | -1.40772 | |
| Haibei | 海北藏族自治州 | Qinghai | 青海省 | -1.69141 | |
| Huangnan | 黄南藏族自治州 | Qinghai | 青海省 | -1.64363 | |
| Hainan | 海南藏族自治州 | Qinghai | 青海省 | -1.61909 | |
| Guoluo | 果洛藏族自治州 | Qinghai | 青海省 | -1.67996 | |
| Yushu | 玉树藏族自治州 | Qinghai | 青海省 | -1.76163 | |
| Haixi | 海西蒙古族藏族自治州 | Qinghai | 青海省 | -1.03317 | |
| Yinchuan | 银川市 | Ningxia | 宁夏回族自治区 | 1.34158 | |
| Shizuishan | 石嘴山市 | Ningxia | 宁夏回族自治区 | -0.55865 | |
| Wuzhong | 吴忠市 | Ningxia | 宁夏回族自治区 | -0.79013 | |
| Guyuan | 固原市 | Ningxia | 宁夏回族自治区 | -0.91797 | |
| Zhongwei | 中卫市 | Ningxia | 宁夏回族自治区 | -1.22425 | |
| Urumqi | 乌鲁木齐市 | Xinjiang | 新疆维吾尔自治区 | | 0.79596 | |
| Karamay | 克拉玛依市 | Xinjiang | 新疆维吾尔自治区 | | 0.03166 | |
| Turpan | 吐鲁番市 | Xinjiang | 新疆维吾尔自治区 | | -0.88397 | |
| Hami | 哈密市 | Xinjiang | 新疆维吾尔自治区 | | -0.81344 | |
| Changji | 昌吉回族自治州 | Xinjiang | 新疆维吾尔自治区 | | -0.61251 | |
| Bortala Mongolia | 博尔塔拉蒙古自治州 | Xinjiang | 新疆维吾尔自治区 | | -1.23445 | |
| Bayinguoleng | 巴音郭楞蒙古自治州 | Xinjiang | 新疆维吾尔自治区 | | -0.63036 | |
| Akesu | 阿克苏地区 | Xinjiang | 新疆维吾尔自治区 | | -0.90931 | |
| Kizilsu Kyrgyz | 克孜勒苏柯尔克孜自治州 | Xinjiang | 新疆维吾尔自治区 | | -1.63846 | |
| Kashgar | 喀什地区 | Xinjiang | 新疆维吾尔自治区 | | -1.07816 | |
| Hetian | 和田地区 | Xinjiang | 新疆维吾尔自治区 | | -1.39513 | |
| Yili | 伊犁哈萨克自治州 | Xinjiang | 新疆维吾尔自治区 | | -0.52560 | |
| Tacheng | 塔城地区 | Xinjiang | 新疆维吾尔自治区 | | -0.83862 | |
| Altay | 阿勒泰地区 | Xinjiang | 新疆维吾尔自治区 | | -1.06790 | |
| Shihezi | 石河子市 | Xinjiang | 新疆维吾尔自治区 | | -0.14415 | |
| Alar | 阿拉尔市 | Xinjiang | 新疆维吾尔自治区 | | -1.63389 | |
| Tumushuke | 图木舒克市 | Xinjiang | 新疆维吾尔自治区 | | -1.67344 | |
| Wujiaqu | 五家渠市 | Xinjiang | 新疆维吾尔自治区 | | -1.51951 | |
